# Supplementary material for: Prognostic value of post-induction chemotherapy 18F-FDG PET-CT in stage II/III non-small cell lung cancer before (chemo-) radiation
Source: PLoS One. 2019 Oct 11;14(10):e0222885. doi: 10.1371/journal.pone.0222885 (PMC6788704; doi:10.1371/journal.pone.0222885)
Supplement: S1 Dataset — (XLSX) [file pone.0222885.s001.xlsx]

## Sheet: Feuil1
PATIENTS	WHO	Year of Dg	Pathology	T	N	M	Stage	Number of induction Chemotherapy	Type CT induction	RT ou RTCT	Begining of RT	Time between Dg et RT	End of RT	progression Y/N	TIME TO PROGRESSION (MONTHS)	FOLLOW UP (MONTHS)	DEATH AFTER 1 YEAR (Y/N)	PROGRESSION IN 1 YEAR (Y/N)	DEATH DURING FOLLOW UP	PROGRESSION DURING FOLLOW UP	SUVmax1	MTV1	SUVmean1	TLG1	SUVpeak1	SUVmax2	MTV2	SUVmean2	TLG2	SUVpeak2	DeltaSUVmax	DeltaMTV	DeltaSUVmean	DeltaTLG	DeltaSUVpeak	DeltaSUVmax	MTV2	RECIST
IRB-1708B-001	1	2014	SQUAMOUS CELL CARCINOMA	X	3	0	IIIB	4	carboplatin paclitaxel	RT	october 2014	7.67	11.2014	N		19	N	N	N	N	36.5	97	18.8969	1833	28.7	2.4	11.6	1.4	16.5	0	-0.934247	-0.880412	-0.925914	-0.990998	-1	-0.934247	11.6	PARTIAL RESPONSE
IRB-1708B-002	0	2012	SQUAMOUS CELL CARCINOMA	2	2	0	IIIA	2	carboplatin paclitaxel	RTCT	August 2012	4	10.2012	N		45	N	N	N	N	12	13	7	89	10.5	8.2	2.4	4.70833	11.3	0	-0.316667	-0.815385	-0.327381	-0.873034	-1	-0.316667	2.4	PARTIAL RESPONSE
IRB-1708B-003	0	2012	ADENOCARCINOMA	2b	0	0	IIA	4	cisplatin pemetrexed	RTCT	February 2013	6	4.2013	Y	11	29	N	Y	Y	Y	14.5	5	9.1	49.8	12.1	8.4	3	5.1	14.1	6.5	-0.42069	-0.4	-0.43956	-0.716867	-0.46281	-0.42069	3	STABILITY
IRB-1708B-004	1	2011	ADENOCARCINOMA	2	2	0	IIIA	4	cisplatin pemetrexed	RT	March 2012	10	5.2012	Y	7	9	Y	Y	Y	Y	18.6	120	11.5	1387.1	17.2	16.4	31	9.50323	294.6	14.2	-0.11828	-0.741667	-0.173633	-0.787614	-0.174419	-0.11828	31	STABILITY
IRB-1708B-005	0	2011	SQUAMOUS CELL CARCINOMA	3	2	0	IIIA	2	cisplatin gemcitabin	RTCT	May 2012	5	7.2012	Y	10	29	N	Y	Y	Y	13.4	11	5.96364	65.6	10.5	13.7	29	2.51034	72.8	9.5	0.0223881	1.63636	-0.579058	0.109756	-0.0952381	0.0223881	29	STABILITY
IRB-1708B-006	0	2012	SQUAMOUS CELL CARCINOMA	3	2	0	IIIA	2	carboplatin paclitaxel	RTCT	May 2012	3	7.2012	Y	2	28	N	Y	Y	Y	14.4	165	7.86061	1297	12.5	6.5	34	3.38235	115	5.6	-0.548611	-0.793939	-0.569708	-0.911334	-0.552	-0.548611	34	PARTIAL RESPONSE
IRB-1708B-007	0	2013	SQUAMOUS CELL CARCINOMA	2b	0	0	IIA	2	carboplatin paclitaxel	RT	September 2013	3	11.2013	Y	3	24	N	Y	Y	Y	14.4	22.4	9.33929	209.2	13.4	5.6	21.6	3.19907	69.1	4.9	-0.611111	-0.0357143	-0.657461	-0.669694	-0.634328	-0.611111	21.6	STABILITY
IRB-1708B-008	0	2012	ADENOCARCINOMA	3	3	0	IIIB	5	cisplatin vinorelbine	RT	October 2012	5	12.2012	Y	4	39	N	Y	N	Y	10.5	113.6	5.49296	624	8.7	8	41	4.00244	164.1	5.9	-0.238095	-0.639085	-0.271351	-0.737019	-0.321839	-0.238095	41	STABILITY
IRB-1708B-009	1	2012	SQUAMOUS CELL CARCINOMA	3	2	0	IIIA	3	cisplatin vinorelbine	RT	October 2012	4	12.2012	Y	7	17	N	Y	N	Y	13.6	140.5	7.85196	1103.2	12.6	4.4	8.6	2.60465	22.4	3.7	-0.676471	-0.93879	-0.66828	-0.979695	-0.706349	-0.676471	8.6	PARTIAL RESPONSE
IRB-1708B-010	0	2012	ADENOCARCINOMA	2	3	0	IIIB	4	cisplatin pemetrexed	RT	November 2012	4	1.2013	Y	10	36	N	Y	N	Y	13.2	72.1	7.70458	555.5	12.2	8.1	77	3.14805	242.4	6.9	-0.386364	0.0679612	-0.591405	-0.563636	-0.434426	-0.386364	77	STABILITY
IRB-1708B-011	2	2012	SQUAMOUS CELL CARCINOMA	3	2	0	IIIA	4	carboplatin paclitaxel	RT	December 2012	5	2.2013	Y	17	35	N	N	Y	Y	24.1	14.5	15.8966	230.5	21.6	14.4	9.6	5.9	86.1	12.3	-0.40249	-0.337931	-0.62885	-0.626464	-0.430556	-0.40249	9.6	STABILITY
IRB-1708B-012	1	2012	ADENOCARCINOMA	4	2	0	IIIB	3	cisplatin pemetrexed	RTCT	January 2013	3	3.2013	Y	3	12	Y	Y	Y	Y	9.2	333.3	4.57546	1525	7.8	5.1	139.8	2.68598	375.5	4.2	-0.445652	-0.580558	-0.412959	-0.75377	-0.461538	-0.445652	139.8	PARTIAL RESPONSE
IRB-1708B-013	0	2012	ADENOCARCINOMA	3	3	0	IIIB	4	cisplatin pemetrexed	RTCT	January 2013	4	3.2013	Y	4	39	N	Y	N	Y	19.5	95.2	10.0998	961.5	16.8	6.3	36.8	2.56793	94.5	4.7	-0.676923	-0.613445	-0.745744	-0.901716	-0.720238	-0.676923	36.8	PARTIAL RESPONSE
IRB-1708B-014	0	2012	ADENOCARCINOMA	1	3	0	IIIB	2	cisplatin pemetrexed	RTCT	March 2013	3	4.2013	Y	4	19	N	Y	Y	Y	12.5	38.1	7.81627	297.8	10.9	8.9	27.2	4.66912	127	7.3	-0.288	-0.286089	-0.402641	-0.573539	-0.330275	-0.288	27.2	STABILITY
IRB-1708B-015	1	2012	SQUAMOUS CELL CARCINOMA	2	2	0	IIIA	2	carboplatin paclitaxel	RT	March 2013	4	5.2013	Y	3	4	Y	Y	Y	Y	14.5	95.3	8.25079	786.3	13.4	7.5	28.1	3.91459	110	5.6	-0.482759	-0.705142	-0.525549	-0.860104	-0.58209	-0.482759	28.1	PARTIAL RESPONSE
IRB-1708B-016	0	2012	ADENOCARCINOMA	4	3	0	IIIB	3	cisplatin pemetrexed	RTCT	March 2013	5	4.2013	N		4	Y	N	Y	N	17.3	56.8	8.58979	487.9	15.6	13.5	28.5	5.32632	151.8	9.5	-0.219653	-0.498239	-0.379925	-0.688871	-0.391026	-0.219653	28.5	PARTIAL RESPONSE
IRB-1708B-017	0	2013	ADENOCARCINOMA	3	2	0	IIIA	2	carboplatin vinorelbine	RTCT	June 2013	3	8.2013	Y	3	19	N	Y	N	Y	12.3	45.1	4.8071	216.8	10.3	5.2	27.6	2.47826	68.4	4.1	-0.577236	-0.388027	-0.484458	-0.684502	-0.601942	-0.577236	27.6	STABILITY
IRB-1708B-018	1	2013	SQUAMOUS CELL CARCINOMA	3	2	0	IIIA	2	carboplatin paclitaxel	RTCT	July 2013	3	8.2013	N		35	N	N	N	N	22.5	36.9	10.9268	403.2	20.4	10.2	17.3	3.65318	63.2	8.3	-0.546667	-0.531165	-0.665669	-0.843254	-0.593137	-0.546667	17.3	PARTIAL RESPONSE
IRB-1708B-019	0	2013	SQUAMOUS CELL CARCINOMA	3	3	0	IIIB	6	carboplatin paclitaxel	RT	November 2013	7	1.2014	Y	16	31	N	N	N	Y	22	112.8	12.117	1366.8	19.8	5.8	9.5	2.82105	26.8	4.1	-0.736364	-0.91578	-0.767183	-0.980392	-0.792929	-0.736364	9.5	PARTIAL RESPONSE
IRB-1708B-020	0	2014	SQUAMOUS CELL CARCINOMA	4	2	0	IIIB	6	carboplatin paclitaxel	RT	October 2014	7	11.2014	Y	14	17	N	N	N	Y	17.8	46	9.66087	444.4	15	1.5	5.8	0.913793	5.3	1.2	-0.91573	-0.873913	-0.905413	-0.988074	-0.92	-0.91573	5.8	PARTIAL RESPONSE
IRB-1708B-021	1	2014	ADENOCARCINOMA	3	2	0	IIIA	3	carboplatin paclitaxel	RT	October 2014	6	12.2014	N		2	Y	Y	Y	N	9.7	98.6	4.89351	482.5	8.8	5	45.6	2.125	96.9	4.3	-0.484536	-0.537525	-0.565751	-0.799171	-0.511364	-0.484536	45.6	PARTIAL RESPONSE
IRB-1708B-022	1	2014	ADENOCARCINOMA	4	2	0	IIIB	2	cisplatin pemetrexed	RTCT	April 2014	2	6.2014	N (sudden death)		24	N	N	N	N	12.4	67.1	7.08048	475.1	10	12.8	47	7.31064	343.6	11	0.0322581	-0.299553	0.0325065	-0.276784	0.1	0.0322581	47	STABILITY
IRB-1708B-023	0	2014	ADENOCARCINOMA	4	2	0	IIIB	3	cisplatin pemetrexed	RTCT	July 2014	4	8.2014	N		24	N	N	N	N	13.6	67.8	7.0295	476.6	10.3	7.9	16.3	4.68712	76.4	6.7	-0.419118	-0.759587	-0.333222	-0.839698	-0.349515	-0.419118	16.3	STABILITY
IRB-1708B-024	0	2014	ADENOCARCINOMA	4	1	0	IIIA	3	cisplatin pemetrexed	RTCT	October 2014	3	12.2014	N		20	N	N	N	N	12	24.5	6.49796	159.2	9.6	7.7	22.7	3.88546	88.2	5.8	-0.358333	-0.0734694	-0.402049	-0.44598	-0.395833	-0.358333	22.7	STABILITY
IRB-1708B-025	1	2014	ADENOCARCINOMA	4	3	0	IIIB	5	carboplatin pemetrexed	RT	January 2015	5	3.2015	Y	2	16	N	Y	N	Y	9.8	151.4	5.35403	810.6	8.3	11.5	16.9	6.33136	107	9.6	0.173469	-0.888375	0.182541	-0.867999	0.156627	0.173469	16.9	STABILITY
IRB-1708B-026	0	2014	ADENOCARCINOMA	4	3	0	IIIB	3+3	carboplatin pemetrexed/carboplatin paclitaxel	RTCT	February 2015	5	4.2015	N		13	N	N	N	N	15.5	39.6	6.38384	252.8	13.3	7.4	6.5	3.93692	25.59	5.1	-0.522581	-0.835859	-0.383298	-0.898774	-0.616541	-0.522581	6.5	STABILITY
IRB-1708B-027	0	2014	ADENOCARCINOMA	X	2	0	IIIA	2	carboplatin pemetrexed	RTCT	January 2015	3	3.2015	Y	0	2	Y	Y	Y	N	9.1	21.4	5.43458	116.3	7.9	10	46.3	5.17927	239.8	8.4	0.0989011	1.16355	-0.0469795	1.06191	0.0632911	0.0989011	46.3	PROGRESSION
IRB-1708B-028	0	2014	ADENOCARCINOMA	4	2	0	IIIB	2	cisplatin pemetrexed	RTCT	January 2015	3	3.2015	Y	14	15	N	N	N	Y	10	71.8	2.87047	206.1	7.5	9	19.2	2.91146	55.9	6.7	-0.1	-0.732591	0.0142781	-0.728772	-0.106667	-0.1	19.2	PARTIAL RESPONSE
IRB-1708B-029	0	2014	SQUAMOUS CELL CARCINOMA	2	3	0	IIIB	4	carboplatin gemcitabine	RT	May 2015	6	6.2015	Y	7	12	N	Y	N	Y	20.1	103.5	10.5749	1094.5	17.7	6	61.5	3.35285	206.2	5.2	-0.701493	-0.405797	-0.682942	-0.811603	-0.706215	-0.701493	61.5	PARTIAL RESPONSE
IRB-1708B-030	1	2014	ADENOCARCINOMA	2A	3	0	IIIB	2	cisplatin pemetrexed	RTCT	January 2015	2	3.2015	Y	3	15	N	Y	N	Y	12.4	75.8	5.80079	439.7	11	3.5	15.9	1.9434	30.9	3.1	-0.717742	-0.790237	-0.664977	-0.929725	-0.718182	-0.717742	15.9	PARTIAL RESPONSE
IRB-1708B-031	0	2015	ADENOCARCINOMA	4	3	0	IIIB	2	carboplatin pemetrexed	RTCT	April 2015	2	5.2015	Y	3	4	Y	Y	Y	Y	10.6	63	5.8254	367	9.4	9.3	86.4	4.66562	403.11	8.5	-0.122642	0.371429	-0.199089	0.0983924	-0.0957447	-0.122642	86.4	STABILITY
IRB-1708B-032	0	2015	SQUAMOUS CELL CARCINOMA	4	2	0	IIIB	3	carboplatin gemcitabine	RTCT	June 2015	5	7.2015	Y	7	11	N	Y	N	Y	9.9	241.9	5.79872	1402.71	8.9	4	30.7	2.07492	63.7	3.2	-0.59596	-0.873088	-0.642176	-0.954588	-0.640449	-0.59596	30.7	PARTIAL RESPONSE
IRB-1708B-033	1	2014	SQUAMOUS CELL CARCINOMA	4	2	0	IIIB	2	paraplatin vinorelbine	RTCT	December 2014	4	2.2015	Y	3	7	Y	Y	Y	Y	14.5	121.4	8.0659	979.2	12.5	6.6	30.1	3.54153	106.6	5.7	-0.544828	-0.752059	-0.560926	-0.891136	-0.544	-0.544828	30.1	STABILITY
IRB-1708B-034	1	2014	ADENOCARCINOMA	4	3	0	IIIB	2	cisplatin vinorelbine	RTCT	January 2015	3	2.2015	Y	3	16	N	Y	N	Y	23.4	187.5	12.9525	2428.6	20.8	16	75	9.96	747	13.5	-0.316239	-0.6	-0.231038	-0.692415	-0.350962	-0.316239	75	STABILITY
IRB-1708B-035	2	2012	ADENOCARCINOMA	4	3	0	IIIB	3	carboplatin pemetrexed	RTCT	December 2012	5	2.2013	Y	13	18	N	N	Y	Y	4.2	155.1	2.26757	351.7	3.2	4.7	104.7	2.43744	255.2	3.8	0.119048	-0.324952	0.0749133	-0.274382	0.1875	0.119048	104.7	STABILITY
rtep5-2001-026	0	2013	ADENOCARCINOMA	1	1	0	IIA	2	cisplatin vinorelbine	RTCT	May 2013	4	6.2013	N		37	N	N	N	N	10.4	17.7	6.31638	111.8	8	4.6	13.9	2.46763	34.3	3.5	-0.557692	-0.214689	-0.609329	-0.693202	-0.5625	-0.557692	13.9	STABILITY
rtep5-2007-070	0	2014	SQUAMOUS CELL CARCINOMA	4	2	0	IIIB	2	cisplatin docetaxel	RTCT	August 2014	3	9.2014	Y	18	21	N	N	N	Y	24.4	23.4	12.5726	294.2	21.1	6.3	22	3.02273	66.5	4.7	-0.741803	-0.0598291	-0.759579	-0.773963	-0.777251	-0.741803	22	STABILITY
rtep5-2011-046	1	2013	ADENOCARCINOMA	2	2	0	IIIA	2	cisplatin vinorelbine	RTCT	December 2013	2	1.2014	Y	13	24	N	N	Y	Y	13	37.7	5.81963	219.4	9.9	12.2	11.2	5.36607	60.1	8.6	-0.0615385	-0.702918	-0.0779358	-0.726071	-0.131313	-0.0615385	11.2	STABILITY
RTEP5-2013-008	0	2012	SQUAMOUS CELL CARCINOMA	X	3	0	IIIB	2	cisplatin vinorelbine	RTCT	October 2012	4	12.2012	Y	12	42	N	Y	N	Y	10.6	7.64	6.71466	51.3	8.8	5.7	5.3	3.4717	18.4	4.5	-0.462264	-0.306283	-0.482967	-0.641326	-0.488636	-0.462264	5.3	STABILITY
RTEP5-2015-013	0	2012	SQUAMOUS CELL CARCINOMA	4	0	0	IIIA	2	cisplatin vinorelbine	RTCT	January 2013	1	3.2013	N		17	N	N	N	N	10.2	5.9	4.71186	27.8	NA	5.9	2.5	3.2	8	NA	-0.421569	-0.576271	-0.320863	-0.71223	NA	-0.421569	2.5	STABILITY
rtep5-2015-050	1	2013	SQUAMOUS CELL CARCINOMA	4	2	0	IIIB	1	cisplatin vinorelbine	RTCT	January 2014	2	3.2014	N		20	N	N	N	N	24.5	38	8.69211	330.3	18.5	16.8	7.8	9.5	74.5	11.7	-0.314286	-0.794737	0.0929458	-0.774447	-0.367568	-0.314286	7.8	STABILITY
rtep5-2015-051	1	2013	ADENOCARCINOMA	3	2	0	IIIA	1	cisplatin vinorelbine	RTCT	January 2014	2	3.2014	Y	8	29	N	Y	N	Y	13.7	51.2	7.7	395.5	10.9	9.9	35.5	5.09014	180.7	7.4	-0.277372	-0.306641	-0.338943	-0.54311	-0.321101	-0.277372	35.5	PARTIAL RESPONSE
rtep5-2015-052	0	2013	ADENOCARCINOMA	1	2	0	IIIA	1	cisplatin paclitaxel	RTCT	February 2014	3	3.2014	N		14	N	N	N	N	7.3	8.3	3.74699	31.1	5.3	2.8	2.2	1.5	3.3	NA	-0.616438	-0.73494	-0.599678	-0.893891	NA	-0.616438	2.2	PARTIAL RESPONSE
rtep5-2015-060	0	2014	SQUAMOUS CELL CARCINOMA	2	2	0	IIIA	1	cisplatin vinorelbine	RTCT	March 2014	1	5.2014	Y	4	6	Y	Y	Y	Y	33.3	26.9	21.4	575.6	29.6	41.8	12.4	23.1	286.8	29.3	0.255255	-0.539033	0.0794393	-0.501737	-0.0101351	0.255255	12.4	STABILITY
rtep5-2016-061	0	2014	ADENOCARCINOMA	X	3	0	IIIB	2	cisplatin vinorelbine	RTCT	March 2014	3	7.2014	N		15	N	N	N	N	7.3	47.7	4.00839	191.2	6.6	3	10.5	1.49524	15.7	2.4	-0.589041	-0.779874	-0.626973	-0.917887	-0.636364	-0.589041	10.5	PARTIAL RESPONSE
rtep5-2018-044	0	2013	SQUAMOUS CELL CARCINOMA	2	3	0	IIIB	2	cisplatin vinorelbine	RTCT	November 2013	3	1.2014	Y	28	31	N	N	N	Y	13.1	35.7	5.90196	210.7	11.1	4.4	17.1	1.68421	28.8	2	-0.664122	-0.521008	-0.714635	-0.863313	-0.81982	-0.664122	17.1	PARTIAL RESPONSE
rtep5-2024-020	0	2013	ADENOCARCINOMA	4	1	0	IIIA	2	cisplatin vinorelbine	RTCT	May 2013	2	6.2013	N		33	N	N	N	N	18.3	63.6	9.16981	583.2	15.1	3.4	41.3	1.76029	72.7	3.1	-0.814208	-0.350629	-0.808034	-0.875343	-0.794702	-0.814208	41.3	PARTIAL RESPONSE
rtep5-2024-027	1	2013	SQUAMOUS CELL CARCINOMA	2	2	0	IIIA	2	cisplatin vinorelbine	RTCT	June 2013	2	7.2013	Y	2	3	Y	Y	Y	Y	50.2	104.8	30.6899	3216.3	46.5	50.1	63.5	30.9786	1967.14	47.1	-0.00199203	-0.394084	0.00940692	-0.388384	0.0129032	-0.00199203	63.5	PARTIAL RESPONSE
rtep5-2024-040	1	2013	SQUAMOUS CELL CARCINOMA	4	2	0	IIIB	2	cisplatin vinorelbine	RTCT	September 2013	2	11.2013	N		30	N	N	N	N	14.6	20.2	8.5495	172.7	13.6	1.7	14.1	1.12057	15.8	1.5	-0.883562	-0.30198	-0.868932	-0.908512	-0.889706	-0.883562	14.1	PARTIAL RESPONSE
rtep5-2026-045	1	2013	ADENOCARCINOMA	3	0	0	IIB	2	cisplatin vinorelbine	RTCT	October 2013	5	11.2013	Y	14	31	N	N	N	Y	9.5	42.8	5.7	242.9	8.7	12	31.5	6.6	209	9.3	0.263158	-0.264019	0.157895	-0.139564	0.0689655	0.263158	31.5	STABILITY
